# Supplementary material
Source: MDPI journal article supplement (https://www.mdpi.com/2073-4395/12/12/3004)
Supplement: s1 [file s1]

## Supplementary Data

**Table S1. Effects of reducing different doses of fertilizers before harvest on aromatic compounds in pepper fruit.**

| Aromatic content<br>( $\mu\text{g}\cdot\text{kg}^{-1}$ ) | Substance<br>number | Treatment               |                                        |                                        |                         |                         |
|----------------------------------------------------------|---------------------|-------------------------|----------------------------------------|----------------------------------------|-------------------------|-------------------------|
|                                                          |                     | CK                      | T1                                     | T2                                     | T3                      | T4                      |
| 3-Pentanone                                              | A                   | 39.14 $\pm$ 5.00a       | 36.34 $\pm$ 1.45a                      | 15.74 $\pm$ 1.13b                      | ND                      | ND                      |
| 1-Hexanal                                                | B                   | 182.52 $\pm$ 8.82b      | 1044.85 $\pm$ 65.63a                   | 975.1 $\pm$ 244.78a                    | 132.75 $\pm$ 0.18b      | 1284.79 $\pm$ 71.17a    |
| 2-Hexenal                                                | C                   | 5086.10 $\pm$ 253.62b   | 8196.24 $\pm$ 407.08a                  | 7276.33 $\pm$ 288.93a                  | 3313.78 $\pm$ 4.37c     | 2768.89 $\pm$ 228.06c   |
| Hexyl alcohol                                            | D                   | 2467.36 $\pm$ 144.46a   | 3164.41 $\pm$ 177.75a                  | 3181.07 $\pm$ 462.69a                  | 1152.88 $\pm$ 3.07b     | 1240.03 $\pm$ 55.70b    |
| (Z)-2-Heptenal                                           | E                   | 149.02 $\pm$ 16.89a     | ND                                     | 69.70 $\pm$ 1.00b                      | ND                      | 131.40 $\pm$ 12.00a     |
| Hexanoic acid                                            | F                   | ND                      | 237.92 $\pm$ 8.70a                     | 152.14 $\pm$ 1.08b                     | ND                      | ND                      |
| 2-Pentylfuran                                            | G                   | 145.56 $\pm$ 11.78a     | 53.39 $\pm$ 4.20bc                     | 69.85 $\pm$ 6.78b                      | 28.41 $\pm$ 0.04c       | ND                      |
| Trans,<br>trans-2,4-Heptadienal                          | H                   | 14.35 $\pm$ 0.86c       | 50.74 $\pm$ 0.48a                      | 30.64 $\pm$ 0.98b                      | ND                      | ND                      |
| 1,3,6-Octatriene, 3,<br>7-dimethyl-                      | I                   | 545.72 $\pm$ 4.41b      | 779.97 $\pm$ 3.93a                     | 428.00 $\pm$ 23.31c                    | 274.46 $\pm$ 0.36d      | 118.03 $\pm$ 3.90e      |
| 1-Methyl-3-cyclohexene-<br>1-carbaldehyde                | J                   | 117.21 $\pm$ 2.05b      | ND                                     | ND                                     | ND                      | 264.89 $\pm$ 15.33a     |
| (E)-2-Octenal                                            | K                   | 37.19 $\pm$ 3.20d       | 230.23 $\pm$ 6.71a                     | 194.08 $\pm$ 7.43b                     | 34.65 $\pm$ 0.05d       | 133.29 $\pm$ 3.40c      |
| Linalool                                                 | L                   | 32.71 $\pm$ 6.68c       | 46.11 $\pm$ 0.72bc                     | 68.24 $\pm$ 3.92a                      | 34.65 $\pm$ 0.05c       | 64.21 $\pm$ 4.72ab      |
| 1-Nonanal                                                | M                   | ND                      | 42.55 $\pm$ 3.70a                      | 26.85 $\pm$ 2.57b                      | 21.41 $\pm$ 0.03b       | 26.29 $\pm$ 5.81b       |
| Propanoic acid,<br>2-methyl-,<br>4-methylpentyl ester    | N                   | 51.05 $\pm$ 2.06a       | 51.45 $\pm$ 3.84a                      | 11.15 $\pm$ 1.46b                      | 10.67 $\pm$ 0.01b       | 19.99 $\pm$ 0.24b       |
| (2E)-2-Nonenal                                           | O                   | 300.04 $\pm$ 40.25bc    | 374.54 $\pm$ 10.20ab                   | 495.66 $\pm$ 47.43a                    | 211.59 $\pm$ 0.28c      | 391.30 $\pm$ 11.63ab    |
| Terpinen-4-ol                                            | P                   | 277.38 $\pm$ 30.80c     | 472.26 $\pm$ 5.84b                     | 594.11 $\pm$ 19.32a                    | 251.37 $\pm$ 0.33c      | 218.84 $\pm$ 11.06c     |
| Methyl salicylate                                        | Q                   | 751.01 $\pm$ 21.41c     | 1861.70 $\pm$ 16.65a                   | 1711.70 $\pm$ 34.32b                   | 592.41 $\pm$ 0.78d      | 748.76 $\pm$ 14.06c     |
| Trans,<br>trans-2,4-Decadien-1-al                        | R                   | 335.50 $\pm$ 65.04b     | 364.80 $\pm$ 5.84b                     | 322.88 $\pm$ 1.56b                     | 518.48 $\pm$ 0.68a      | 138.36 $\pm$ 2.24c      |
| Eicosane, 10-methyl-<br>$\alpha$ -Ionone                 | S<br>T              | 16.16 $\pm$ 0.71a<br>ND | 37.80 $\pm$ 9.77a<br>13.22 $\pm$ 0.33a | 24.19 $\pm$ 4.52a<br>13.14 $\pm$ 1.71a | 39.28 $\pm$ 0.05a<br>ND | 22.08 $\pm$ 5.37a<br>ND |
| Geranylacetone                                           | U                   | ND                      | 38.61 $\pm$ 2.62a                      | 6.00 $\pm$ 0.72b                       | 5.68 $\pm$ 0.01b        | ND                      |
| Irisone                                                  | V                   | 26.62 $\pm$ 1.06bc      | 125.43 $\pm$ 6.64a                     | 12.01 $\pm$ 1.45cd                     | 3.06 $\pm$ 0.03d        | 28.52 $\pm$ 1.54b       |
| $\alpha$ -cis-Himachalene                                | W                   | 70.39 $\pm$ 0.90a       | 70.96 $\pm$ 3.35a                      | 72.88 $\pm$ 0.71a                      | 70.57 $\pm$ 0.09a       | 23.09 $\pm$ 0.10b       |
| 2,4-Di-tert-butylphenol                                  | X                   | ND                      | 21.51 $\pm$ 1.21a                      | ND                                     | 5.68 $\pm$ 0.01b        | ND                      |

The above data were determined on the pepper samples from the third and fourth harvests. Data were the means of three replicates with standard error ( $\pm$ SE). Different letters indicated significant differences between treatments at  $P$  of 0.05 according to Tukey's multiple range test ( $n = 3$ ). With no fertiliser reduction as the control (CK), the T1, T2, T3 and T4 treatments represented 20%,

40%, 60% and 80% reduction in fertiliser application from 0 to 6 days before each harvest, respectively.

**Table S2. Screening of representative aromatic substances based on random forest model.**

| Aromatic                                        | Substance number | Increase in MSE | <i>P</i> _value |
|-------------------------------------------------|------------------|-----------------|-----------------|
| 3-Pentanone                                     | A                | 0.48            | 0.00            |
| 1-Hexanal                                       | B                | 0.07            | 0.96            |
| 2-Hexenal                                       | C                | 0.42            | 0.00            |
| Hexyl alcohol                                   | D                | 0.31            | 0.00            |
| (Z)-2-Heptenal                                  | E                | 0.03            | 0.67            |
| Hexanoic acid                                   | F                | 0.04            | 1.00            |
| 2-Pentylfuran                                   | G                | 0.29            | 0.01            |
| Trans, trans-2,4-Heptadienal                    | H                | 0.16            | 0.90            |
| 1,3,6-Octatriene, 3, 7-dimethyl-                | I                | 0.39            | 0.00            |
| 1-Methyl-3-cyclohexene-1-carbaldehyde           | J                | 0.04            | 1.00            |
| (E)-2-Octenal                                   | K                | 0.04            | 0.61            |
| Linalool                                        | L                | 0.06            | 0.36            |
| 1-Nonanal                                       | M                | 0.02            | 0.99            |
| Propanoic acid, 2-methyl-, 4-methylpentyl ester | N                | 0.42            | 0.00            |
| (2E)-2-Nonenal                                  | O                | 0.03            | 0.83            |
| Terpinen-4-ol                                   | P                | 0.02            | 0.13            |
| Methyl salicylate                               | Q                | 0.01            | 0.98            |
| Trans, trans-2,4-Decadien-1-al                  | R                | 0.03            | 0.78            |
| Eicosane, 10-methyl-                            | S                | 0.01            | 0.93            |
| $\alpha$ -Ionone                                | T                | 0.01            | 1.00            |
| Geranylacetone                                  | U                | 0.03            | 0.90            |
| Irisone                                         | V                | 0.00            | 0.78            |
| $\alpha$ -cis-Himachalene                       | W                | 0.01            | 0.87            |
| 2,4-Di-tert-butylphenol                         | X                | 0.01            | 1.00            |

The importance of various components in aromatic substances was measured as the ‘percentage of increase of mean square error (MSE)’ in random forests, with higher MSE values implying more important representative substances and identifying the significance of each substance.

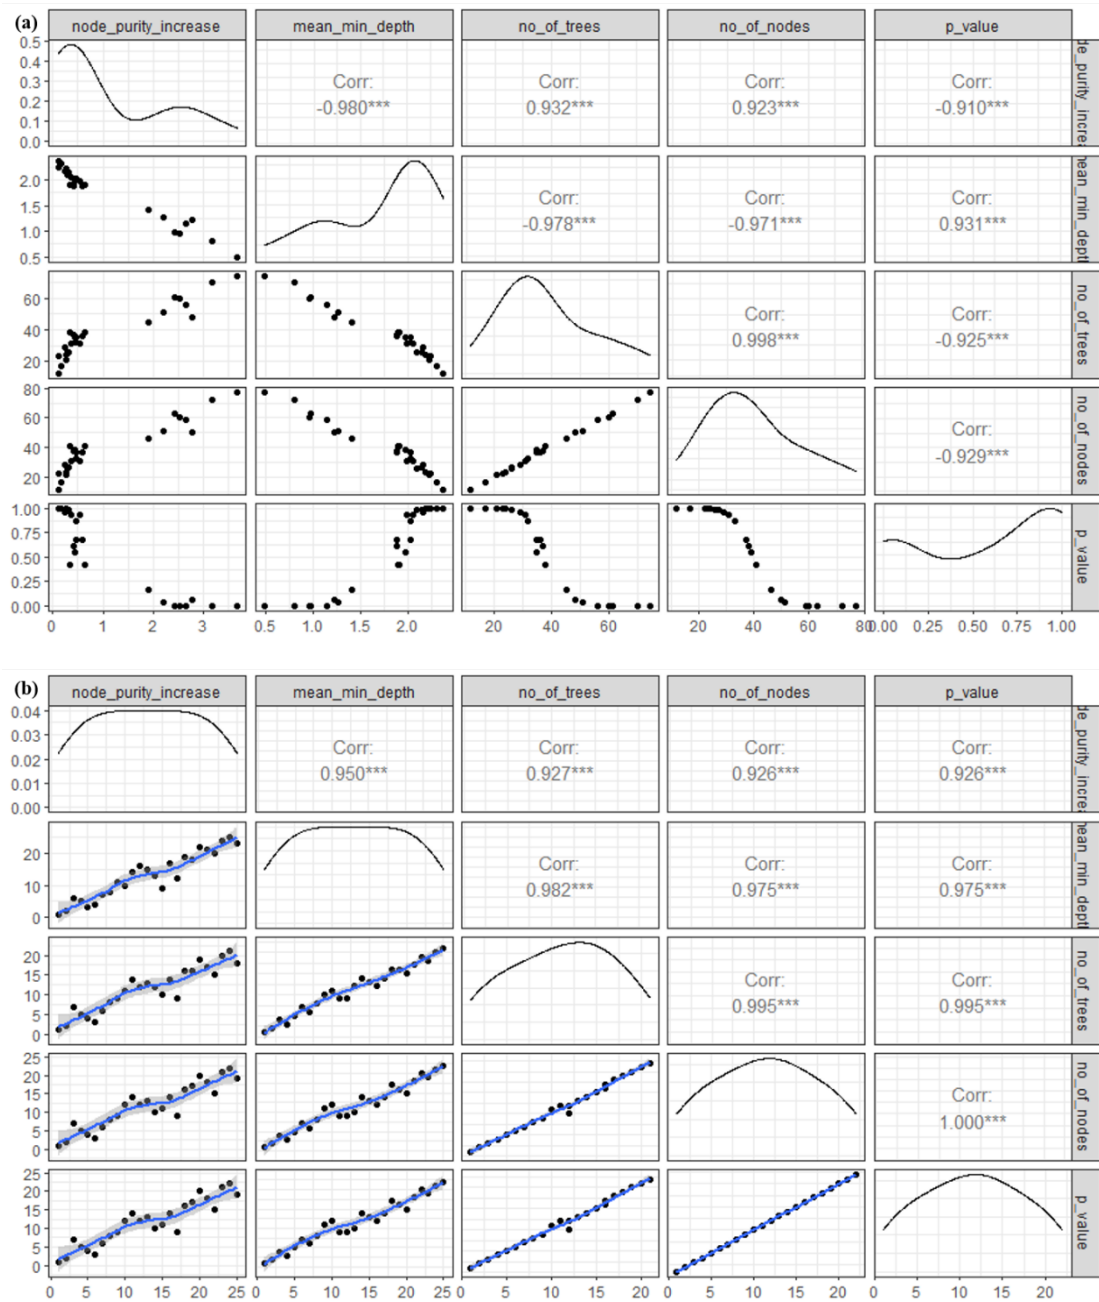

**Figure S1. Relations between measures of importance and between rankings according to different measures.** Among them, Figure S1a represented relations between measures of importance, Figure S1b represented relations between rankings according to different measures. The above relations analysis was based on the method of spearman rank correlation coefficient.
